# Supplementary material for: (1→3)-α-d-Glucooligosaccharides Increase the Killing Capacity of NK Cells against Selected Human Colon Cancer Cells
Source: MDPI journal article supplement (doi:10.3390/molecules28104212), 2023-05-20
Supplement: s1 [file s1]

## (1→3)- $\alpha$ -D-Glucooligosaccharides increase the killing capacity of NK cells against selected human colon cancer cells

Marta Kinga Lemieszek, Paulina Adamczyk, Iwona Komaniecka, Wojciech Rzeski, Michał Tomczyk and Adrian Wiater

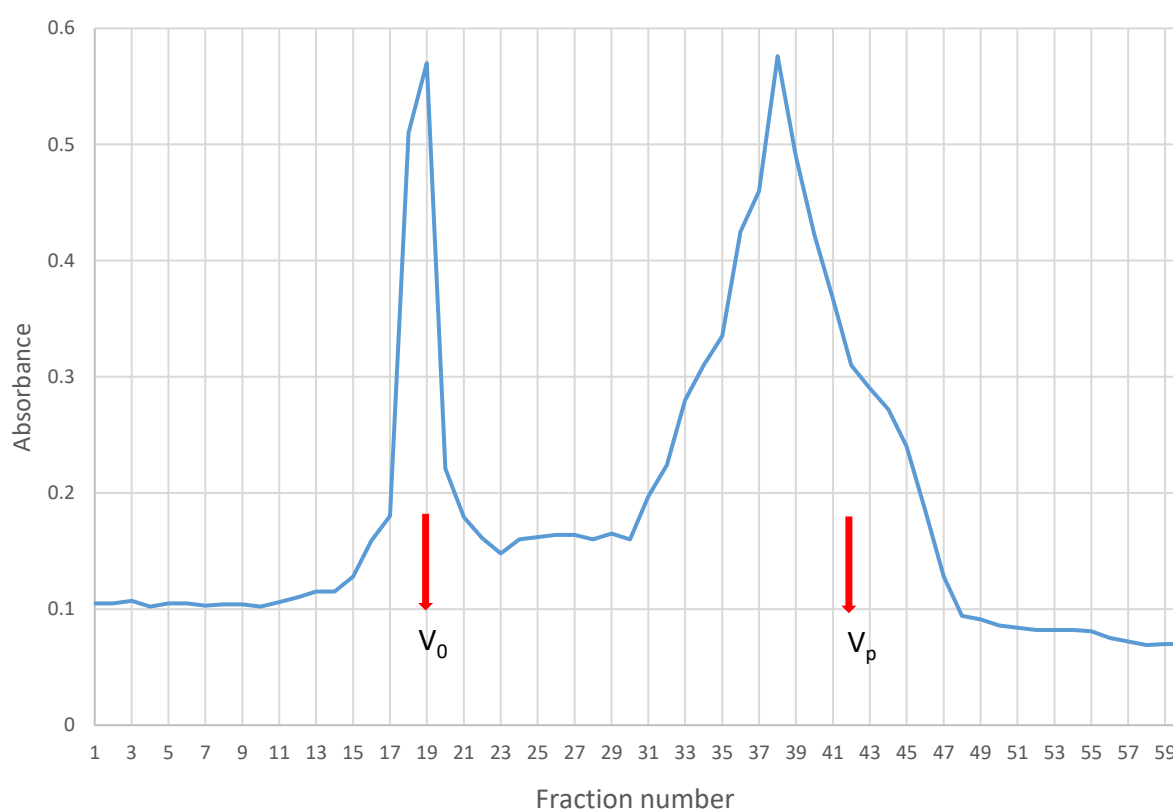

**Figure S1.** SEC chromatogram of the crude (1→3)- $\alpha$ -D-glucan isolated from the fruiting bodies of the polypore fungus *L. sulphureus* at Sepharose CL-6B column, eluted with 1 M NaOH, flow rate 0,2 mL/min, fraction size 1 mL. Column was calibrated using standards: Dextran Blue 2000 (Mw = 2 mln Da;  $V_0$  at 19 fraction) and Dextran 10 (Mw = 10 000 Da;  $V_p$  at 42 fraction) (both from Pharmacia, Uppsala, Sweden).
